# Supplementary material for: Cellular Adjuvant Properties, Direct Cytotoxicity of Re-differentiated Vα24 Invariant NKT-like Cells from Human Induced Pluripotent Stem Cells
Source: PubMed Central journal article supplement — Stem Cell Reports. 2016 Feb 9;6(2):213–27. doi: 10.1016/j.stemcr.2016.01.005 (PMC4750166; doi:10.1016/j.stemcr.2016.01.005), 2016-02-09
Supplement: mmc1.pdf [file mmc1.pdf]

**Stem Cell Reports, Volume 6**

**Supplemental Information**

**Cellular Adjuvant Properties, Direct Cytotoxicity of Re-differentiated  $V\alpha 24$  Invariant NKT-like Cells from Human Induced Pluripotent Stem Cells**

**Shuichi Kitayama, Rong Zhang, Tian-Yi Liu, Norihiro Ueda, Shoichi Iriguchi, Yutaka Yasui, Yohei Kawai, Minako Tatsumi, Norihito Hirai, Yasutaka Mizoro, Tatsuaki Iwama, Akira Watanabe, Mahito Nakanishi, Kiyotaka Kuzushima, Yasushi Uemura, and Shin Kaneko**

**Figure S1**

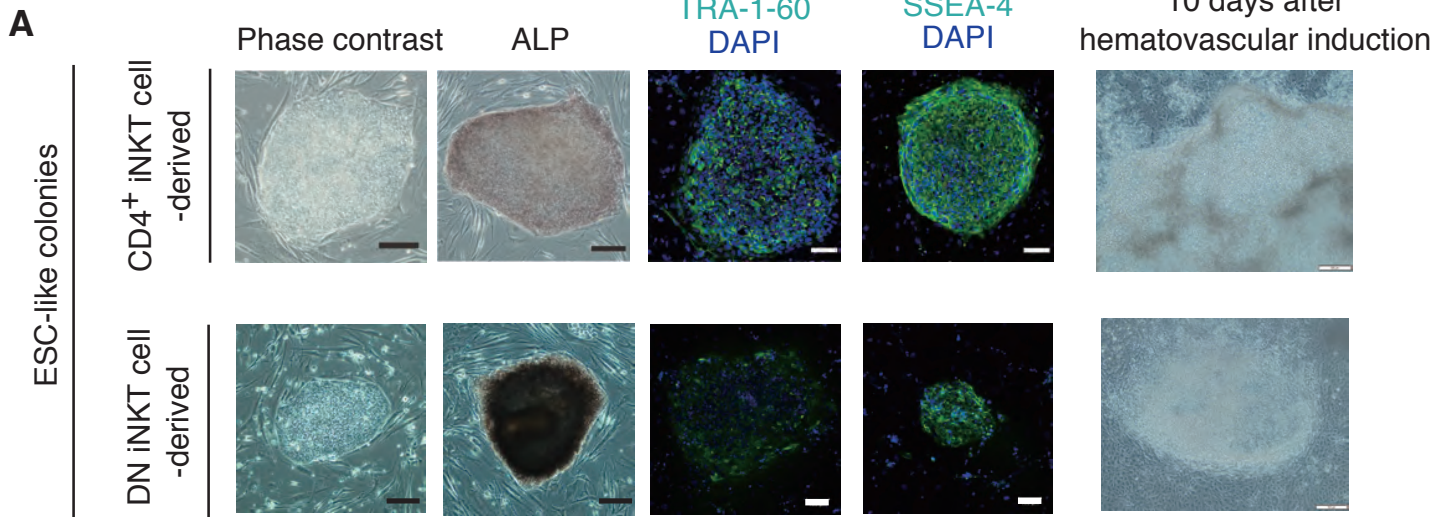

**B**

| Cell source           | Donor | Initial cell number (×10 <sup>6</sup> ) | No. of ESC-like colonies observed at day 21 of induction | No. of transgene-free colonies / No. of colonies picked-up |
|-----------------------|-------|-----------------------------------------|----------------------------------------------------------|------------------------------------------------------------|
| CD4 <sup>+</sup> iNKT | A     | 1.0                                     | 82                                                       | 5 / 5 (100%)                                               |
|                       | A     | 0.5                                     | 47                                                       |                                                            |
| CD4 <sup>+</sup> iNKT | B     | 1.0                                     | >100                                                     | 6 / 7 (86%)                                                |
|                       | B     | 0.5                                     | >100                                                     |                                                            |
| DN iNKT               | B     | >1.0                                    | 38                                                       | 0 / 6 (0%)                                                 |
| DN iNKT               | C     | >1.0                                    | 63                                                       | 0 / 24 (0%)                                                |

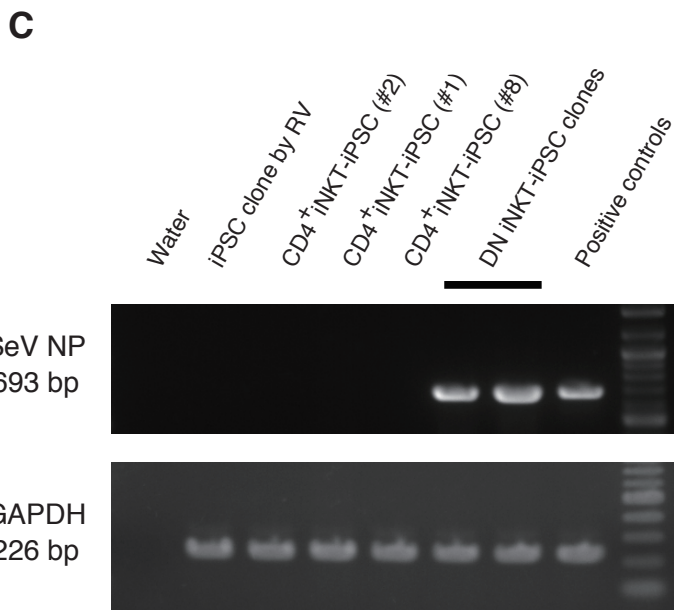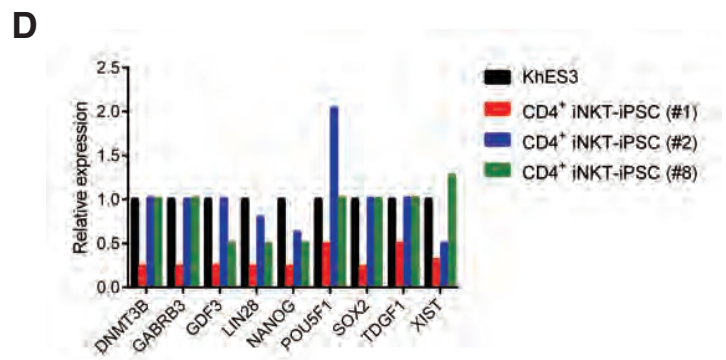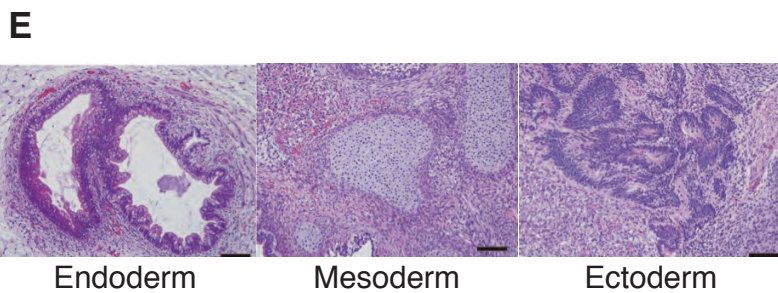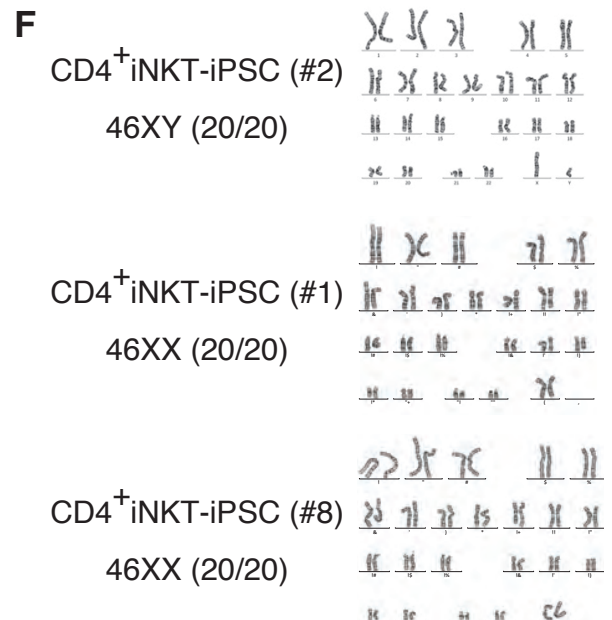

**Figure S2**

**A**

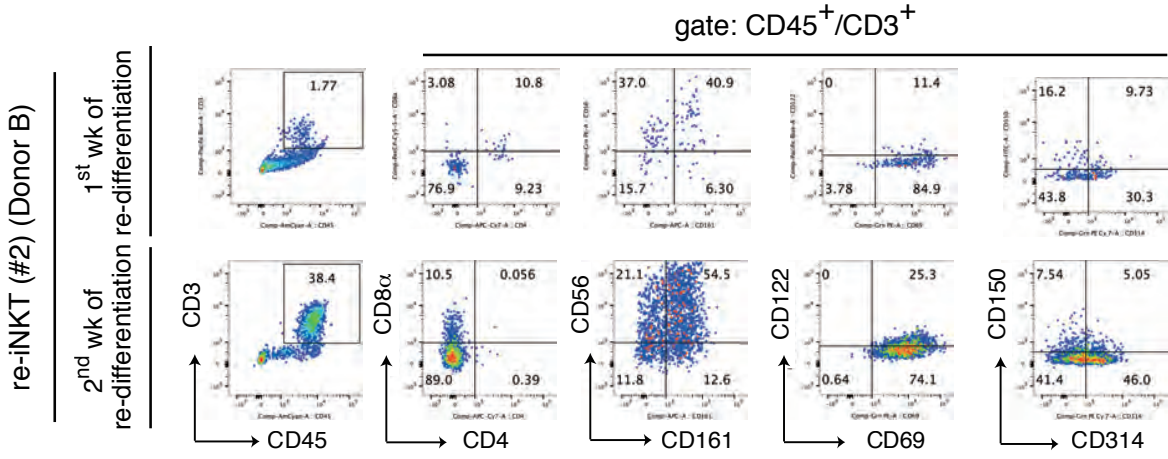

**B**

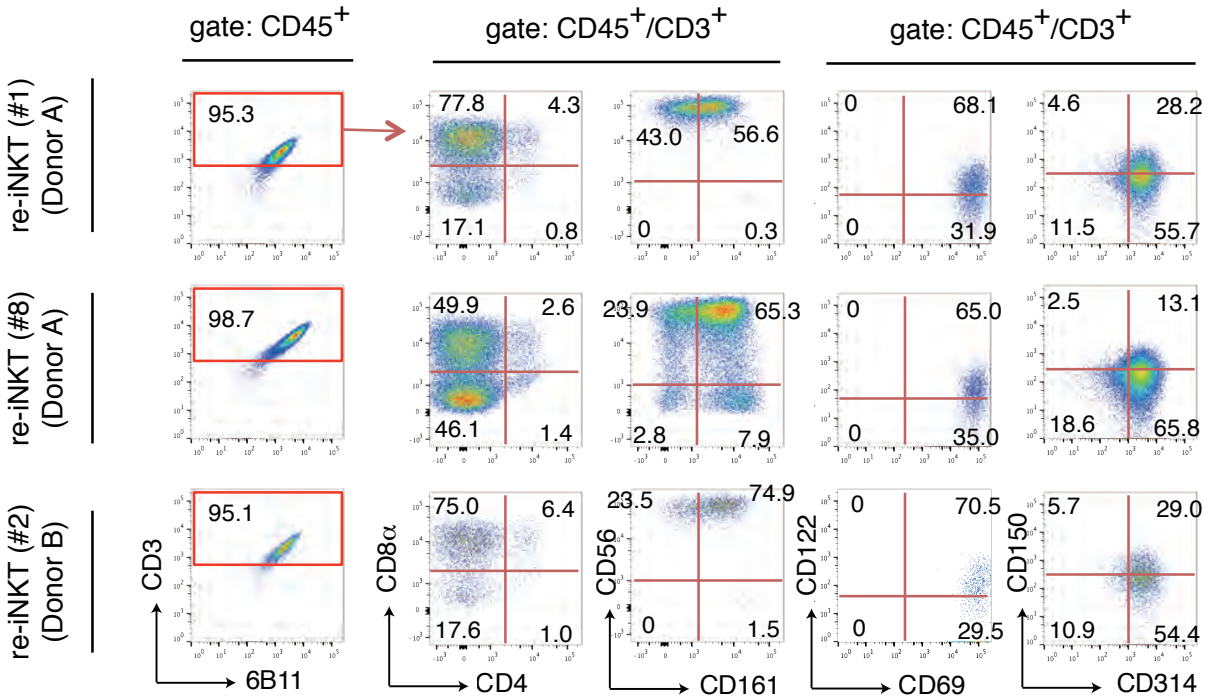

**C**

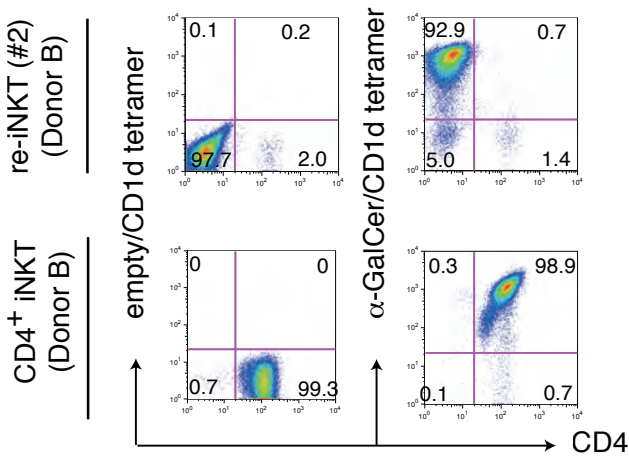

**D**

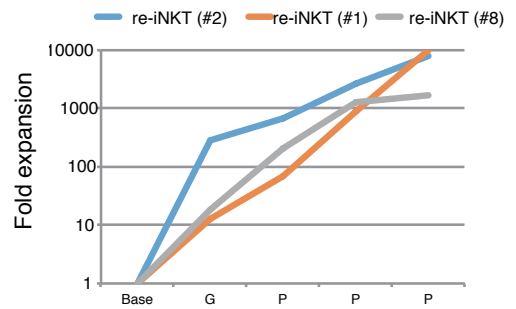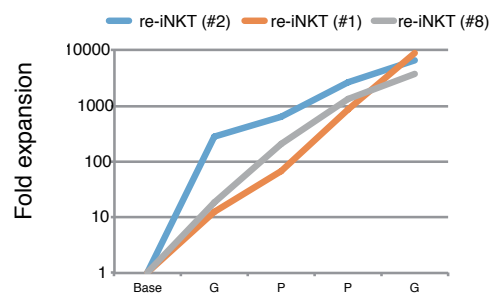

**E**

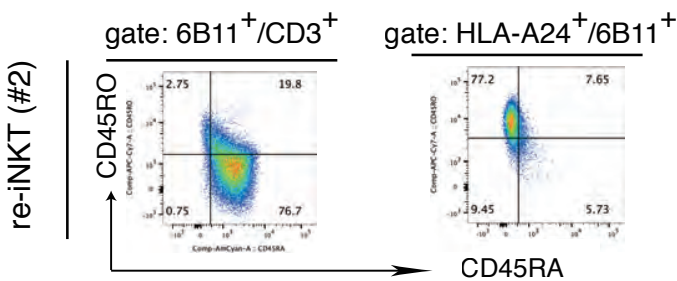

Figure S3

A

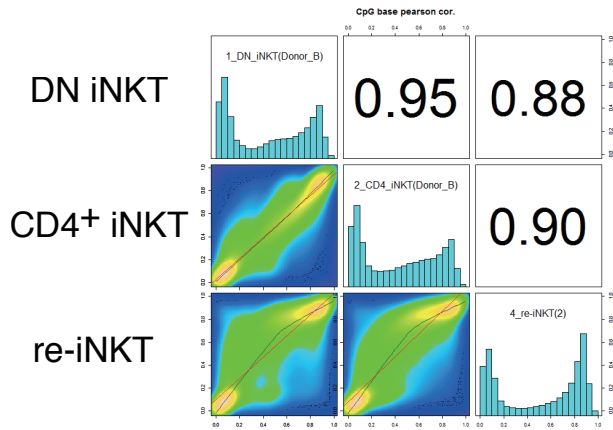

B

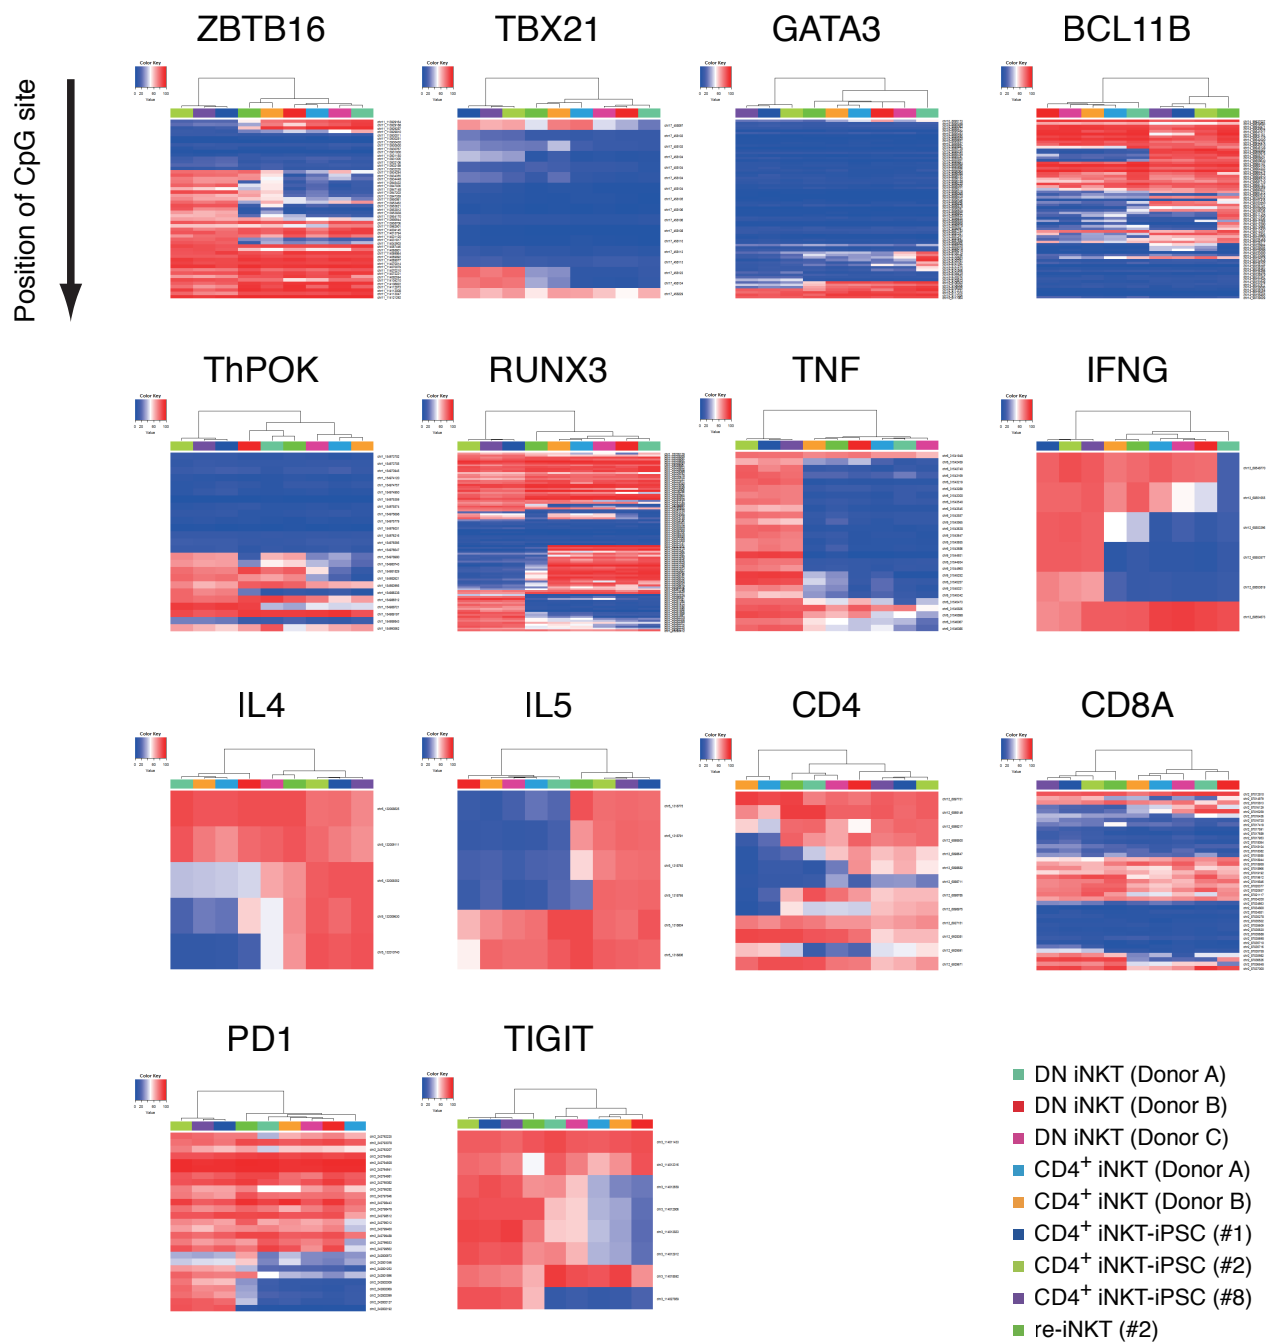

Figure S4

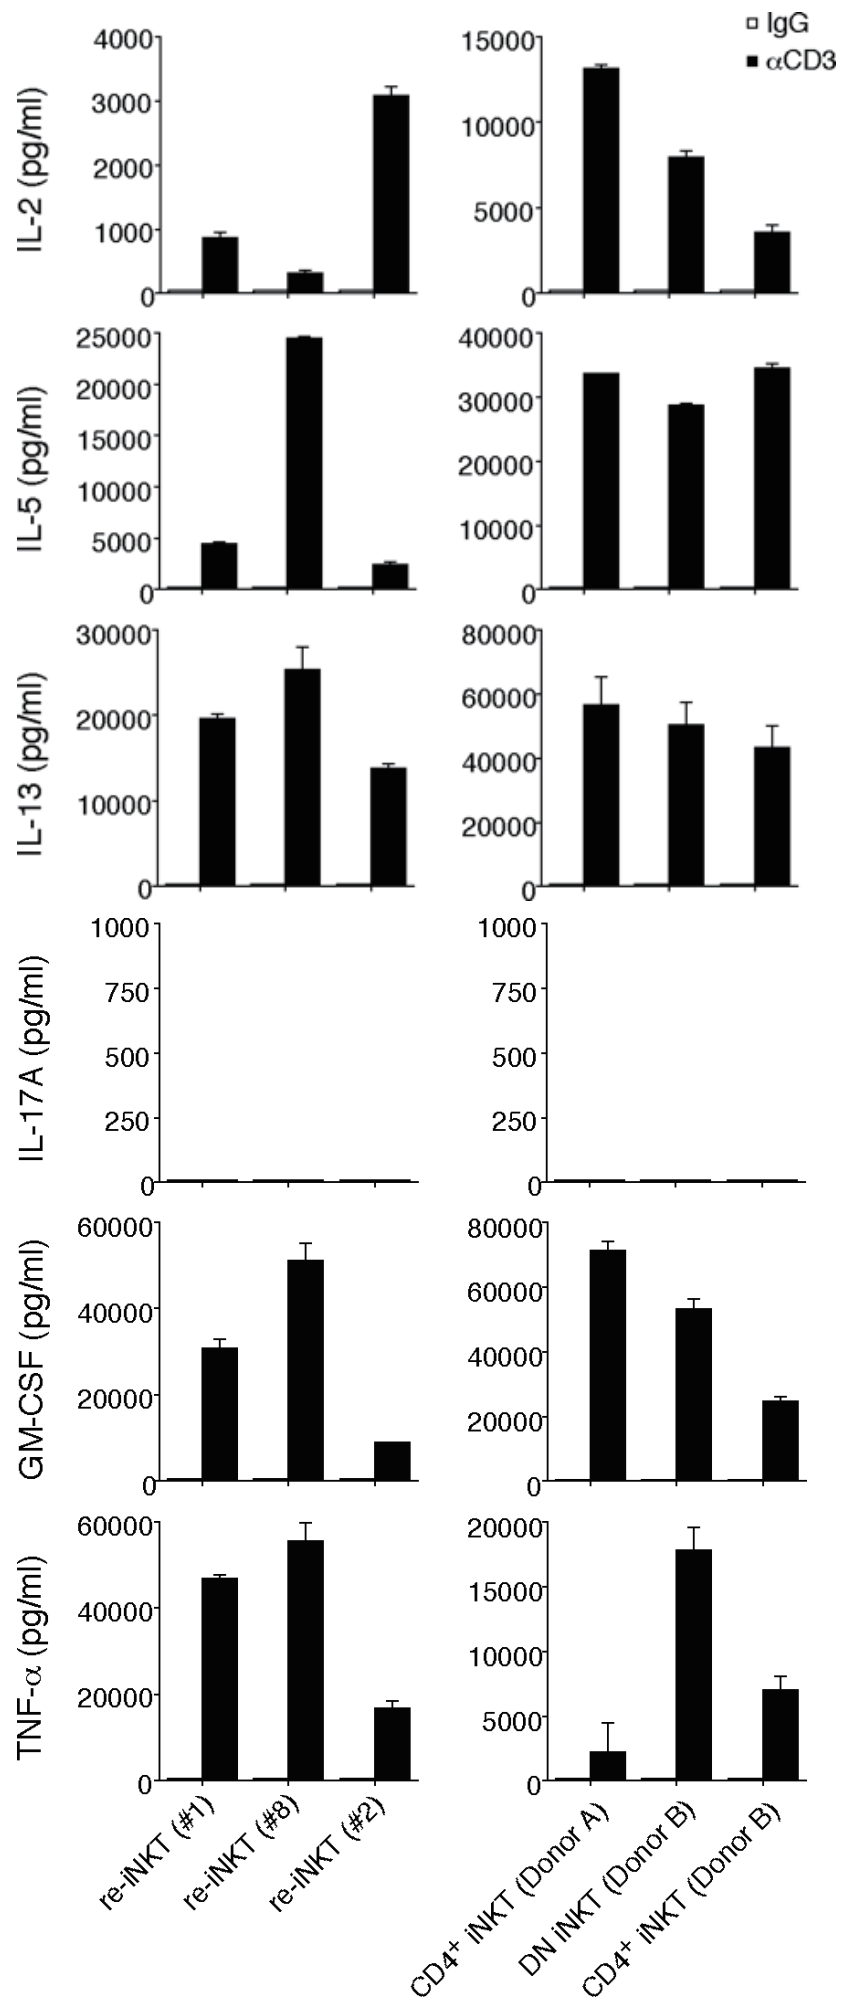

Figure S5

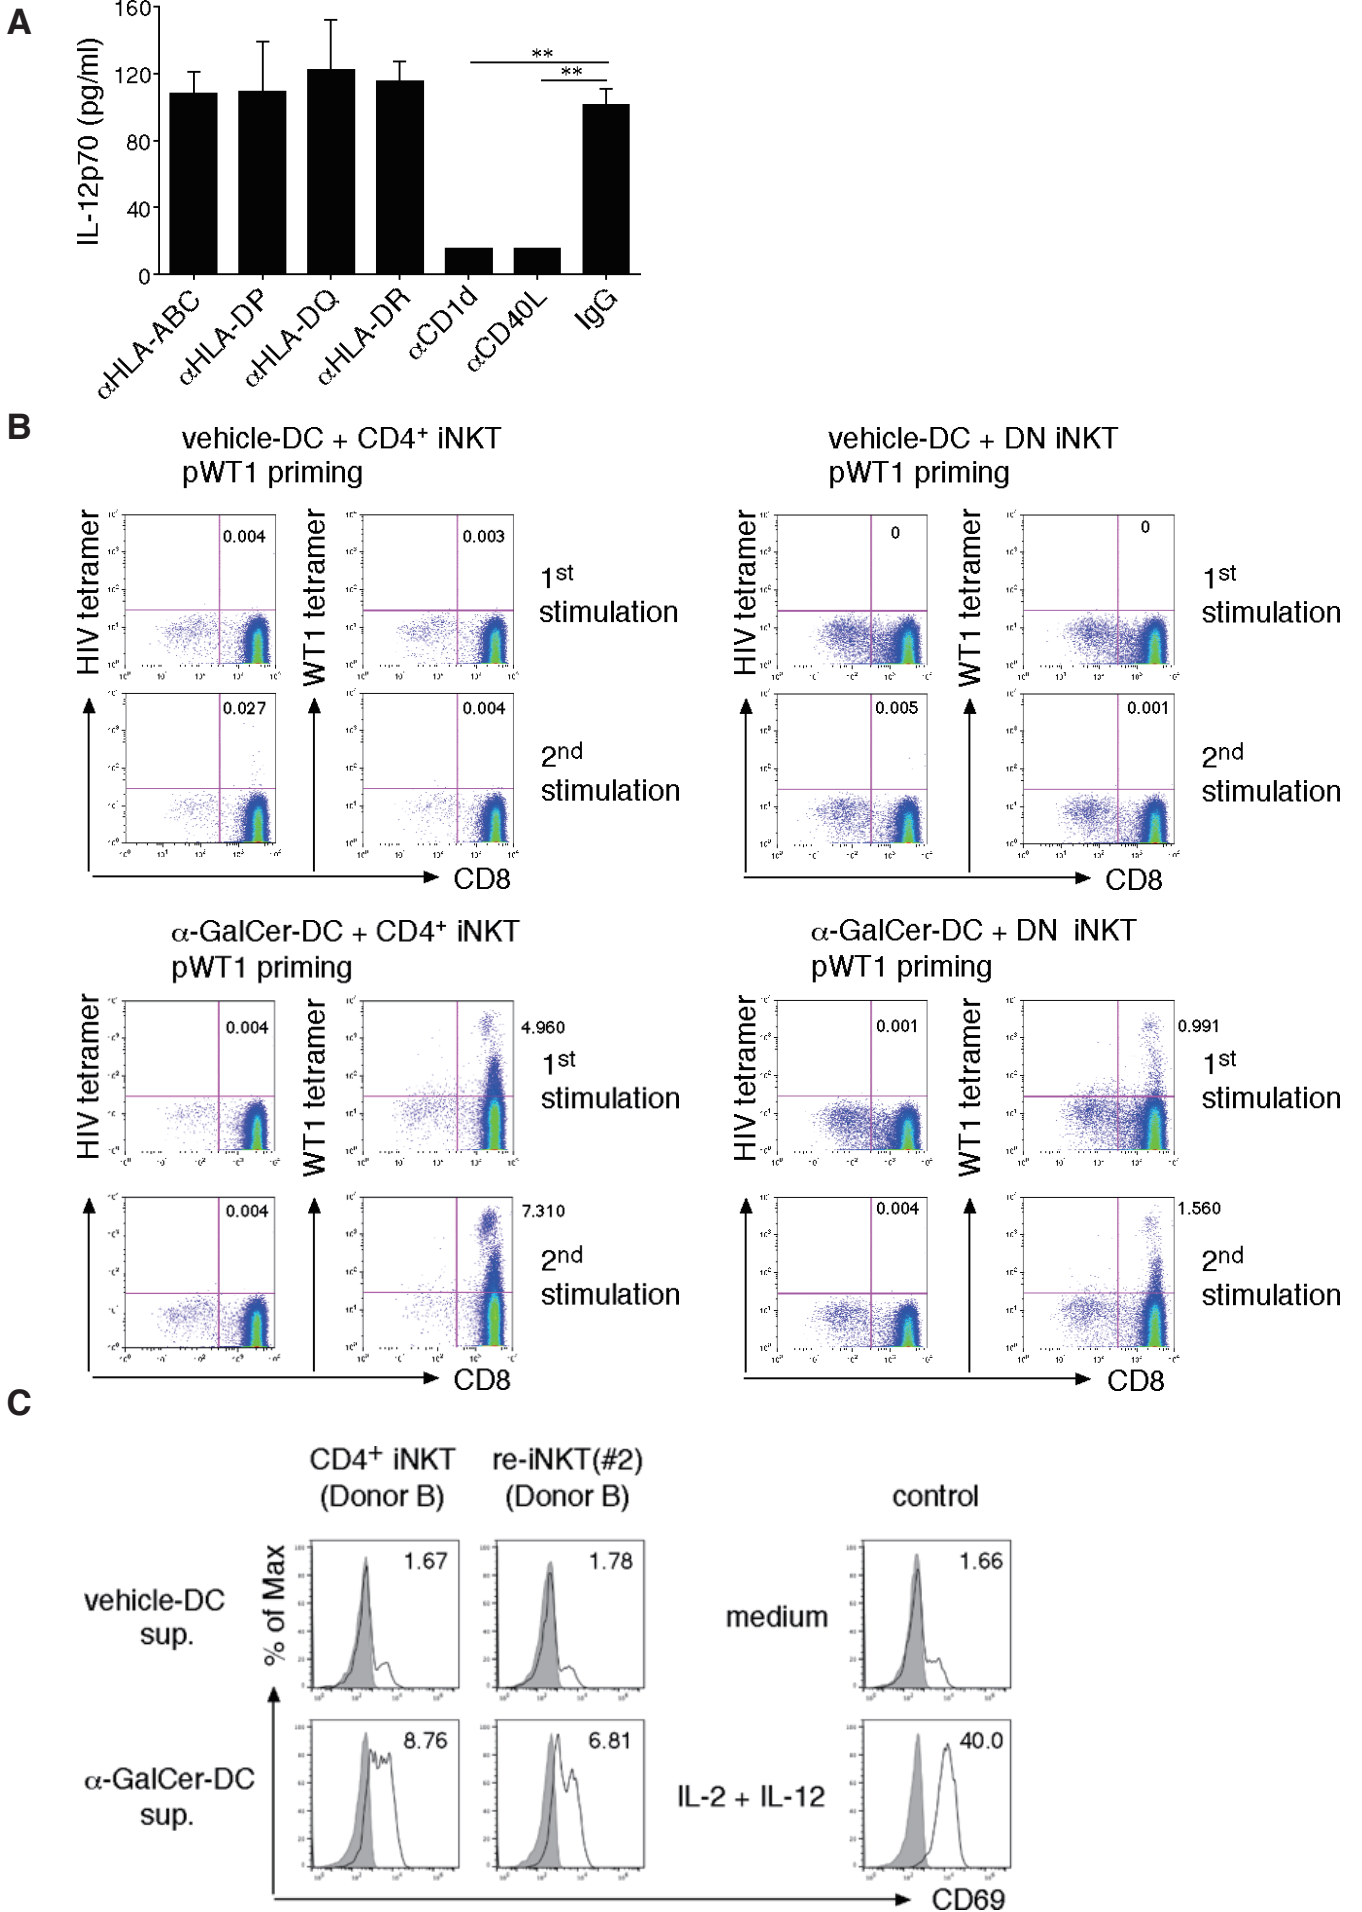

Figure S6

A

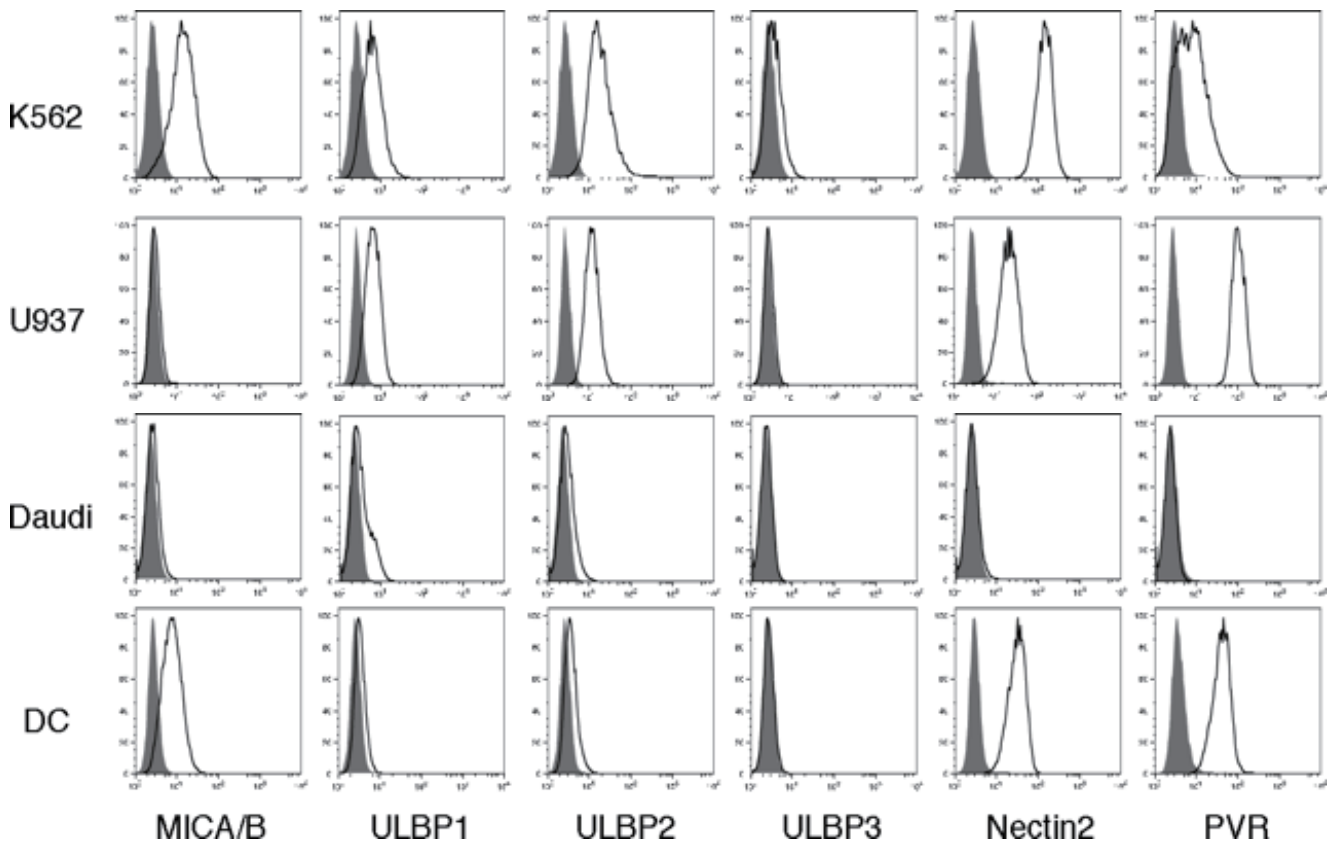

B

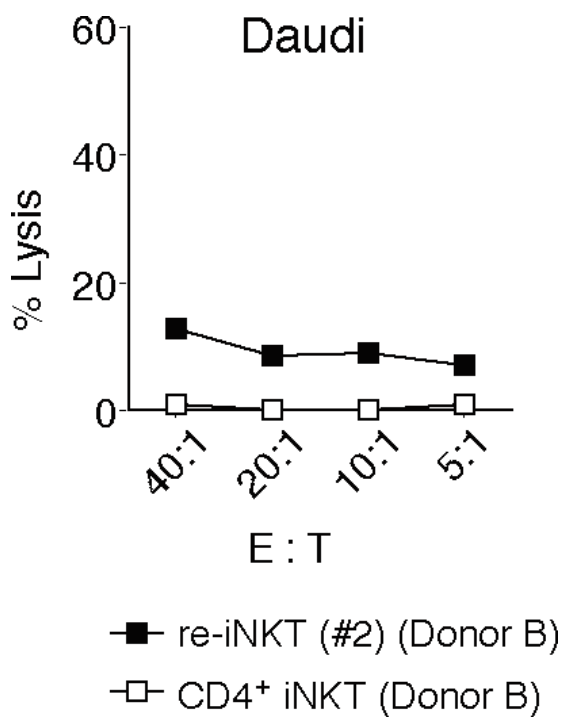

# Supplemental Information

## Supplemental Figure Legends

### Figure S1

#### *Generation of iPSCs from human CD4<sup>+</sup> iNKT cells*

(A) CD4<sup>+</sup> and DN iNKT cell-derived ESC-like colonies and sac-like hematopoietic structures derived from the colonies. Shown are phase contrast, alkaline phosphatase stained and immunofluorescent images of representative iNKT cell-derived ESC-like colonies. The upper right image shows hematopoietic cells in a sac-like structure observed in a differentiation culture of CD4<sup>+</sup> iNKT-iPSCs. In contrast, no hematopoietic cells were observed in a differentiation culture from DN iNKT-iPSCs. Scale bar = 100  $\mu$ m. (B) Numbers of ESC-like colonies derived from CD4<sup>+</sup> or DN iNKT cells from multiple donors. (C) PCR-based analysis for detection of Sendai virus genomic RNA remnants. No established CD4<sup>+</sup> iNKT-iPSC colonies retained remnant Sendai virus. SeV NP, sendai virus vector nucleocapside protein; RV, retroviral vector. (D) Quantitative PCR analysis for the indicated pluripotency-related genes in the indicated human embryonic cell lines. Individual PCR reactions were normalized to 18S ribosomal RNA (rRNA). Relative expression values to embryonic stem cell line KhES3 are indicated. Data was run in triplicate in 2 independent experiments. (E) Representative HE-stained sections of a CD4<sup>+</sup> iNKT-iPSC (clone #2)-derived teratoma from a NOD/ShiJic-scid mouse. The iPSCs differentiated into cell lineages derived from endoderm, mesoderm and ectoderm. (F) Karyotype analysis of CD4<sup>+</sup> iNKT-iPSCs clones #1, #2 and #8.



## **Figure S2, Related to Figure 1:**

### ***Phenotypic profile and proliferative potential of re-iNKT cells***

(A) Flow cytometric analysis of cells from CD4<sup>+</sup> iNKT-iPSC clone #2 on 1<sup>st</sup> and 2<sup>nd</sup> week of re-differentiation on OP9/DL1. Shown are the surface protein expression patterns on re-differentiating cells from a representative experiment. (B) Flow cytometric analysis of cells re-differentiating from CD4<sup>+</sup> iNKT-iPSC clones #1, #2 and #8 35 days after inducing re-differentiation. Shown are the surface protein expression patterns on re-differentiating cells gated by CD45, CD3 and 6B11. The results are representative of more than 5 independent experiments from the 3 clones and control PBMCs. (C)  $\alpha$ -GalCer/CD1d tetramer staining. Re-iNKT cells #2 (upper panels) or parental iNKT cells (lower panels) were stained with negative control CD1d tetramer (left panels) or  $\alpha$ -GalCer-loaded CD1d tetramer (right panels) followed by anti-CD4 mAb. (D) Stimulation-mediated expansion of re-iNKT cells. Re-iNKT cells were initially stimulated with  $\alpha$ -GalCer-pulsed PBMCs then expanded by PHA-P or  $\alpha$ -GalCer-pulsed PBMCs. Shown are representative results from re-iNKT cells derived from the 3 clones. G:  $\alpha$ -GalCer, P: PHA-P. (E) Expression profile of CD45RA and CD45RO before (left panel) and after (right panel)  $\alpha$ -GalCer stimulation on re-iNKT cells (clone #2).

## **Figure S3, Related to Figure 2:**

### ***DNA methylation profiles of re-iNKT cells***

(A) Density plots of DNA methylation levels for DN iNKT (Donor B) vs. CD4<sup>+</sup> iNKT (Donor B) (top), DN iNKT (Donor B) vs. re-iNKT (middle), and CD4<sup>+</sup> iNKT (Donor B) vs. re-iNKT (bottom). Numbers in the panels denote pair-wise Pearson's correlation scores. The histograms on the diagonal describe distributions of CpGs with different DNA methylation levels.

(B) Differential regulation of DNA methylation on differentiation- and function-related genes. Heatmaps visualize DNA methylation levels for each CpG nucleotide (blue, non-methylated; red, methylated). Unsupervised hierarchical clustering of cell samples was performed using the Euclidian distance and Ward's method.

### **Figure S4, Related to Figure 3:**

#### ***Cytokine profiles of re-iNKT cells***

Re-iNKT cells ( $2 \times 10^5$  cells/well) were stimulated for 24 h with plate-bound control IgG or anti-CD3 mAb (10  $\mu$ g/ml), after which the levels of the indicated cytokines in the culture supernatant were evaluated using beads-based multiplex immunoassays (left panels). Responses of parental iNKT cells served as references (right panels). Data were run in triplicate, and the experiment was repeated 2 times. The results of 1 representative experiment are shown. Bars depict means  $\pm$  s.d.

### **Figure S5, Related to Figure 4:**

#### ***Induction of tumor Ag-specific CTLs and NK cells via parental iNKT cell-DC interaction***

(A) IL-12p70 production by  $\alpha$ -GalCer-DCs stimulated by re-iNKT cells in the presence of blocking antibodies. Data were run in triplicate, and experiments were repeated 2 times; the results of 1 representative experiment are shown. Bars depict means  $\pm$  s.d. (B)  $\alpha$ -GalCer-DCs were cultured for 12 h with CD4<sup>+</sup> or DN iNKT cells, irradiated and cultured with autologous CD8<sup>+</sup> T cells in the presence of WT1<sub>235-243</sub> peptide. After 10 days of culture, the frequencies of WT1<sub>235-243</sub>-specific CTLs were determined by staining for WT1 tetramer (1st stimulation). The cells were then restimulated by irradiated autologous PBMCs pre-pulsed with WT1<sub>235-243</sub> peptide.

After an additional 9 days of culture, the frequencies of WT1<sub>235-243</sub>-specific CTLs were determined by staining for WT1 tetramer (2nd stimulation). HIV tetramer served as a negative control. One representative result from at least 2 independent experiments is shown. WT1 peptide-loaded CD4<sup>+</sup> and DN iNKT/ $\alpha$ -GalCer-DCs induced expansion of WT1-tetramer-positive T cells more efficiently than WT1 peptide-loaded CD4<sup>+</sup> and DN iNKT/vehicle-DCs. The cellular adjuvant properties of CD4<sup>+</sup> iNKT cells for antigen-specific CTL priming were superior to those of DN iNKT cells. (C) Representative flow cytometry profiles of surface CD69 on CD3<sup>+</sup>CD56<sup>+</sup> NK cells cultured for 48 h in the presence of 25% cell-free supernatant taken from iNKT-DC coculture. Medium control and IL-2 (300 IU/ml) plus IL-12 (20 ng/ml) control served as references. Open histograms represent staining for CD69; gray histograms represent isotype control.

**Figure S6, Related to Figure 5:**

***Expression of NKG2D ligands and DNAM-1 ligands in leukemic cell lines and DCs***

(A) Surface expression of MICA/B, ULBP1, ULBP2 and ULBP3 as NKG2D ligands, and Nectin2 and PVR as DNAM-1 ligands on K562, U937, Daudi and DCs. Shown are representative staining histograms for the indicated surface molecules (open histograms) and isotype-matched controls (filled histograms). (B) Cytotoxicity toward Daudi cells at the indicated E/T ratios. Daudi cells that expressed neither NKG2D ligand nor DNAM-1 ligands had little susceptibility to re-iNKT cell-lysis.

**Table S1. The list of genes extracted for Figure 2C**

| <b>Gene</b>   | <b>Accession</b>                                                                                                                                                                     |
|---------------|--------------------------------------------------------------------------------------------------------------------------------------------------------------------------------------|
| ZBTB16        | NM_006006+NM_001018011                                                                                                                                                               |
| TBX21         | NM_013351                                                                                                                                                                            |
| GATA3         | NM_002051+NM_001002295                                                                                                                                                               |
| CCDC22+FOXP3  | NM_014008+NM_001114377+NM_014009                                                                                                                                                     |
| RORC          | NM_005060+NM_001001523                                                                                                                                                               |
| ZBTB7B(ThPOK) | NR_045515+NM_001252406+NR_049765+NM_001256455+NR_046206                                                                                                                              |
| RUNX3         | NM_004350+NM_001031680                                                                                                                                                               |
| RUNX1         | NM_001754+NM_001001890+NM_001122607                                                                                                                                                  |
| BCL11B        | NM_138576+NM_022898                                                                                                                                                                  |
| TCF7          | NM_003202+NM_001134851+NM_201634+NM_201632+NM_213648+NR_033449                                                                                                                       |
| ID3           | NM_002167                                                                                                                                                                            |
| ID2           | NM_002166                                                                                                                                                                            |
| ETS1          | NM_005238+NM_001143820+NM_001162422                                                                                                                                                  |
| ETS2          | NM_001256295+NM_005239                                                                                                                                                               |
| LEF1+LEF1-AS1 | NM_001130713+NM_001130714+NM_016269+NM_001166119+NR_029374+NR_029373                                                                                                                 |
| HES1          | NM_005524                                                                                                                                                                            |
| SOX13         | NM_005686                                                                                                                                                                            |
| MYB           | NM_001161660+NM_001161656+NM_001130172+NM_001130173+NM_005375+NM_001161658+NM_001161659+NM_001161657                                                                                 |
| GFI1          | NM_001127216+NM_005263+NM_001127215                                                                                                                                                  |
| TAL1          | NM_003189                                                                                                                                                                            |
| IKZF1         | NM_001220767+NM_001220769+NM_001220768+NM_001220766+NM_001220765+NM_001220774+NM_001220773+NM_001220772+NM_001220771+NM_001220770+NM_006060+NM_001220776+NM_001220775                |
| IKZF2         | NM_016260+NM_001079526                                                                                                                                                               |
| IKZF3         | NM_183232+NM_012481+NM_001257411+NM_001257410+NM_001257409+NM_183229+NM_183228+NM_001257412+NM_183231+NM_183230+NM_001257408+NM_001257413+NM_001257414+NR_047560+NR_047561+NR_047559 |
| TCF12         | NM_207038+NM_207036+NM_003205+NM_207037+NM_207040                                                                                                                                    |
| GATA2         | NM_001145662+NM_001145661+NM_032638                                                                                                                                                  |
| CEBPA         | NM_004364                                                                                                                                                                            |
| SATB1         | NM_001195470+NM_002971+NM_001131010                                                                                                                                                  |
| EOMES         | NM_005442                                                                                                                                                                            |
| RBPJ          | NM_005349+NM_203283+NM_015874+NM_203284                                                                                                                                              |
| STAT5B        | NM_012448                                                                                                                                                                            |
| TNF           | NM_000594                                                                                                                                                                            |
| IFNG          | NM_000619                                                                                                                                                                            |
| IL2           | NM_000586                                                                                                                                                                            |
| IL4           | NM_000589+NM_172348                                                                                                                                                                  |
| IL5           | NM_000879                                                                                                                                                                            |
| IL10          | NM_000572                                                                                                                                                                            |
| IL13          | NM_002188                                                                                                                                                                            |
| IL17A         | NM_002190                                                                                                                                                                            |
| CSF1          | NM_000757+NM_172212+NM_172210+NM_172211                                                                                                                                              |
| CSF2          | NM_000758                                                                                                                                                                            |
| IL12RB1       | NM_005535+NM_153701                                                                                                                                                                  |
| IL12RB2       | NM_001559+NR_047584+NM_001258214+NM_001258215+NM_001258216+NR_047583                                                                                                                 |
| IL17RB        | NM_018725                                                                                                                                                                            |
| IL23R         | NM_144701                                                                                                                                                                            |
| IL4R          | NM_000418+NM_001257407+NM_001257997+NM_001257406                                                                                                                                     |
| CXCR3         | NM_001142797+NM_001504                                                                                                                                                               |
| CXCR6         | NM_006564                                                                                                                                                                            |
| IFNGR1        | NM_000416                                                                                                                                                                            |
| IL15RA        | NM_001256765+NM_002189+NM_172200+NM_001243539+NR_046362                                                                                                                              |
| IL2RA         | NM_000417                                                                                                                                                                            |
| IL2RB         | NM_000878                                                                                                                                                                            |
| IL2RG         | NM_000206                                                                                                                                                                            |
| IL7R          | NM_002185                                                                                                                                                                            |

**Table S2.** List of antibodies used in this study

| Antigen                        | Clone      | Isotype     |
|--------------------------------|------------|-------------|
| CD1d                           | 51.1       | mouse IgG2b |
| CD122                          | TU27       | mouse IgG1  |
| CD150                          | A12(7D4)   | mouse IgG1  |
| CD161                          | HP-3G10    | mouse IgG1  |
| CD183(CXCR3)                   | G025H7     | mouse IgG1  |
| CD196(CCR6)                    | G034E3     | mouse IgG2b |
| CD226(DNAM-1)                  | 11A-8      | mouse IgG1  |
| CD226(DNAM-1)                  | DX11       | mouse IgG1  |
| CD279(PD-1)                    | EH12.2H7   | mouse IgG1  |
| CD3                            | HIT3a      | mouse IgG2a |
| CD3                            | UCHT1      | mouse IgG1  |
| CD314(NKG2D)                   | 1D11       | mouse IgG1  |
| CD4                            | RPA-T4     | mouse IgG1  |
| CD40L                          | TRAP-1     | mouse IgG1  |
| CD40L                          | 40804      | mouse IgG2b |
| CD45                           | HI30       | mouse IgG1  |
| CD56                           | B159       | mouse IgG1  |
| CD56                           | HCD56      | mouse IgG1  |
| CD69                           | FN50       | mouse IgG1  |
| CD86                           | IT2.2      | mouse IgG2b |
| CD8 $\alpha$                   | 3B5        | mouse IgG2a |
| CD8 $\alpha$                   | SK1        | mouse IgG1  |
| CD96                           | NK92.39    | mouse IgG1  |
| FasL                           | NOK-1      | mouse IgG1  |
| FasL                           | Polyclonal | goat IgG    |
| granzyme B                     | GB11       | mouse IgG1  |
| HLA-A24                        | 17A10      | mouse IgG2b |
| HLA-ABC                        | W6/32      | mouse IgG2a |
| HLA-DP                         | B7/21      | mouse IgG3  |
| HLA-DQ                         | SPVL3      | mouse IgG2a |
| HLA-DR                         | L243       | mouse IgG2a |
| MIC A/B                        | 6D4        | mouse IgG2a |
| nectin-2                       | TX31       | mouse IgG1  |
| NKp44                          | p44-8      | mouse IgG1  |
| NKp46                          | 9E-2       | mouse IgG1  |
| perfolin                       | dG9        | mouse IgG2b |
| PVR                            | SKII.4     | mouse IgG1  |
| TCR V $\alpha$ 24J $\alpha$ 18 | 6B11       | mouse IgG1  |
| TCR V $\beta$ 11               | C21        | mouse IgG2a |
| TIGIT                          | MBSA43     | mouse IgG1  |
| TNF $\alpha$                   | Polyclonal | goat IgG    |
| TRAILR1                        | Polyclonal | goat IgG    |
| TRAILR2                        | B-K29      | mouse IgG1  |
| ULBP1                          | 170818     | mouse IgG2a |
| ULBP2                          | 165903     | mouse IgG2a |
| CD16                           | 3G8        | mouse IgG1  |

| Isotype control | Clone      |
|-----------------|------------|
| mouse IgG1      | MOPC-21    |
| mouse IgG1      | P3.6.2.8.1 |
| mouse IgG2a     | G155-178   |
| mouse IgG2b     | eBMG2b     |

## **Supplemental Experimental Procedures**

### ***Cell lines, peptides, cytokines and chemicals***

C1R transfectants were established as described (Liu et al., 2008). The cell lines of myelogenous leukemia K562, histiocytic lymphoma U937 and Burkitt's lymphoma Daudi were purchased. HLA-A\*24:02-restricted and modified 9-mer Wilms' tumor gene (WT1)<sub>235-243</sub> peptide (CMTWNQMNL) was synthesized by Toray Research Center (Kamakura, Japan). Recombinant human (rh) interleukin (IL)-2, rhIL-4 and rh-granulocyte macrophage colony-stimulating factor (GM-CSF) (Primmune, Kobe, Japan), rhIL-12p70 (R&D systems, Minneapolis, MN, USA), and rhIL-7, rhIL-15 and rh fms-related tyrosine kinase 3 ligand (Flt-3L) (Peprotec, UK) were purchased. rh basic fibroblast growth factor (bFGF) and phytohemagglutinin-P (PHA-P) were purchased from WAKO chemical (Osaka, Japan). Vascular endothelial growth factor (VEGF) and rh stem cell factor (SCF) were purchased from R&D systems. Penicillin-killed *Streptococcus pyogenes* (OK432) was purchased from Chugai Pharmaceutical (Tokyo, Japan).  $\alpha$ -galactosylceramide ( $\alpha$ -GalCer; KRN7000) was purchased from Funakoshi (Tokyo).

### ***Preparation of human monocyte-derived DCs and CD8<sup>+</sup> T cells***

Human monocyte-derived-DCs were induced as described previously (Liu et al., 2008). Briefly, CD14<sup>+</sup> monocytes were isolated from PBMCs using positive magnetic cell sorting with CD14 microbeads (Miltenyi Biotec, Auburn, CA) and cultured at  $1.0 \times 10^6$  cells/ml in the presence of rhGM-CSF and rhIL-4 (50 ng/ml each). On day 6, nonadherent DCs were harvested and served as immature DCs. CD8<sup>+</sup> T cells were isolated from PBMCs by negative magnetic cell sorting using a CD8<sup>+</sup> T cell isolation kit (Miltenyi Biotec).

### ***Preparation and activation of NK cells***

PBMCs were stimulated with immobilized anti-CD16 mAb in X-VIVO 20 medium (Lonza, Walkersville, MD) supplemented with 5% heat-inactivated human plasma, rhIL-2, and OK432 for 24 h at 39 °C. Then the cells were harvested and cultured in the presence of rhIL-2 at 37 °C. After 10 days of culture, NK cells were isolated using a NK cell isolation kit (Miltenyi Biotec, Bergisch Gladbach, Germany) and cultured for another 10 days. To acquire the resting state, NK cells were cultured for 24 h in the absence of IL-2. Resting state NK cells were cultured for 48 h in the presence of 25% cell-free supernatant taken from iNKT-DC coculture. To prepare supernatant, vehicle or  $\alpha$ -GalCer-DCs ( $1.0 \times 10^6$ ) were cultured with iNKT cells ( $5.0 \times 10^5$ ) for 24 h.

#### ***RT-PCR and Quantitative PCR***

Total RNA was extracted from iPSCs using an RNeasy Micro kit (Qiagen) and reverse transcribed using High Capacity cDNA Reverse Transcription kits (Applied Biosystems) with random 6-mer primers. RT-PCR was performed using ExTaq HS (Takara). Individual PCR reactions were normalized against GAPDH rRNA. Primer sequences used in RT-PCR were, 5'-AGACCCTAAGAGGACGAAGA-3' (forward) and 5'-ACTCCCATGGCGTAACTCCATAGTG-3' (reverse) for SeV NP, 5'-GAAGGTGAAGGTCGGAGTC-3' (forward) and 5'-GAAGATGGTGATGGGATTTC-3' (reverse) for GAPDH. Quantitative-PCR was performed using a TaqMan Array Human Stem Cell Pluripotency Card (Applied Biosystems). Individual PCR reactions were normalized against 18S rRNA.

### ***Immunohistochemistry***

Human ESC/iPSC colonies fixed in 4% paraformaldehyde were blocked with 8% goat serum and stained with primary antibodies (anti-SSEA-4 1:50, sc-21704, Santa Cruz; anti-TRA-1-60 1:100, MAB4360, Millipore), after which they were stained with secondary antibody (goat anti-mouse IgG, 1:500, A11029, Invitrogen). Nuclei were counterstained with 4', 6-diamidino-2-phenylindol (DAPI; S-1200, Vector Laboratories) according to the manufacturer's instructions. Photomicrographs were taken with a LSM710 confocal microscope (Carl Zeiss).

### ***Teratoma formation***

iNKT-iPSC colonies were trypsinized and injected ( $1.0 \times 10^6$  cells/mouse) into the medulla of the testis of NOD/ShiJic-*scid* mice. Nine to twelve weeks after injection, tumors that formed in the testis were extracted, fixed in formalin and embedded in paraffin.

### ***Karyotype analysis***

The iPSC cell karyotype was determined by LSI Medience Corporation (Tokyo, JAPAN) using the standard staining protocol for Giemsa-banding.

### ***Microarray-based DNA methylation analysis***

The EZ DNA methylation kit (Zymo Research, Irvine, CA) was used for bisulfite conversion of 500 ng genomic DNA. Bisulfite-converted DNA was then hybridized to HumanMethylation450 BeadChip (Illumina, San Diego, CA) following the Illumina Infinium HD Methylation protocol. Fluorescent signals were read by iScan (Illumina) and normalized by GenomeStudio V2011.1 (Illumina). DNA methylation levels were calculated by GenomeStudio and are represented as  $\beta$ -values ranging from 0 (non-methylated) to 1 (completely methylated).  $\beta$ -values with detection



P-value  $\geq 0.05$  and probes whose annotations were not given in RefSeq were removed. Bioinformatic analysis was conducted using R 3.1.0 including R package methylKit (Akalin A, et al., Genome Biol., 2012). The gene region from 1,500 bp upstream of the transcription start site (TSS) to the 3' end of the coding region was subjected to analysis to identify differentially DNA methylated genes. Heatmap visualization and hierarchical clustering were conducted using the heatmap.2 function in gplots and hclust function in R, respectively.

## Reference

Akalin, A., Kormaksson, M., Li, S., Garrett-Bakerman, F.E., Figueroa, M.E., Melnick, A., and Mason, C.E. (2012) . methylKit: a comprehensive R package for the analysis of genome-wide DNA methylation profiles. *Genome biology* 13, R87

Liu, T.Y., Uemura, Y., Suzuki, M., Narita, Y., Hirata, S., Ohshima, H., Ishihara, O., and Matsushita, S. (2008). Distinct subsets of human invariant NKT cells differentially regulate T helper responses via dendritic cells. *European journal of immunology* 38, 1012-1023.
